# Supplementary material
Source: PubMed Central journal article supplement (PMC7722135)
Supplement: NIHMS1630049-supplement-sup_FigS1.pdf [file NIHMS1630049-supplement-sup_FigS1.pdf]

## SUPPLEMENTAL FIGURES AND TABLE

Nagai et al; An injectable hydrogel-formulated inhibitor of prolyl-4-hydroxylase promotes T regulatory cell recruitment and enhances alveolar bone regeneration during resolution of experimental periodontitis

### Supplemental Figures

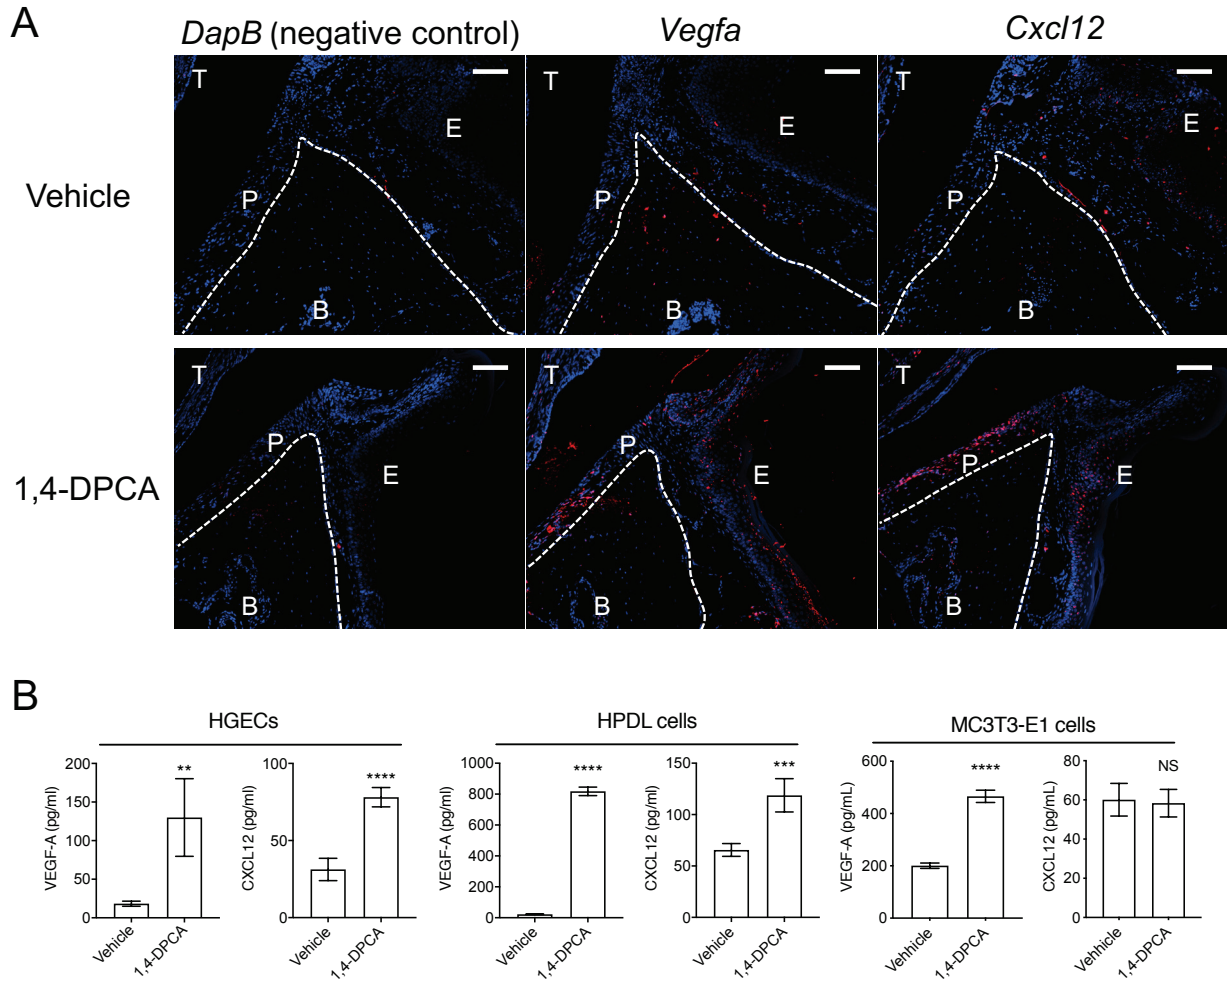

### Supplemental figure S1: 1,4-DPCA/hydrogel induces VEGF and CXCL12 production in gingival epithelium and periodontal ligament during the resolution of periodontitis.

Mice were subjected to LIP for 10 days followed by 5 days without ligatures to enable resolution. At the onset of resolution (day 10), the mice were subcutaneously injected once with 1,4-DPCA/hydrogel or vehicle alone and were euthanized on day 15 for fluorescent histochemistry. Periodontal tissue sections were stained for mRNA expression of *Vegfa* (red), *Cxcl12* (red), and DAPI (blue) using RNAscope *in situ* hybridization. B, Bone; E, Epithelium; P, Periodontal ligament; T, Tooth. Scale bars, 100  $\mu$ m. (B) Human gingival epithelial cells (HGECs), human periodontal ligament (HPDL) cells, and MC3T3-E1 osteoblastic cells were stimulated with 1,4-DPCA (50  $\mu$ g/ml final concentration) or vehicle control (DMSO; 0.17% final concentration). After 24h, culture supernatants were collected and the levels of VEGF and CXCL12 were determined by ELISA. Data are shown as means  $\pm$  SD ( $n=4$  cell cultures). \*\* $P < 0.01$ , \*\*\* $P < 0.001$ , \*\*\*\* $P < 0.0001$  (Student's  $t$  test).

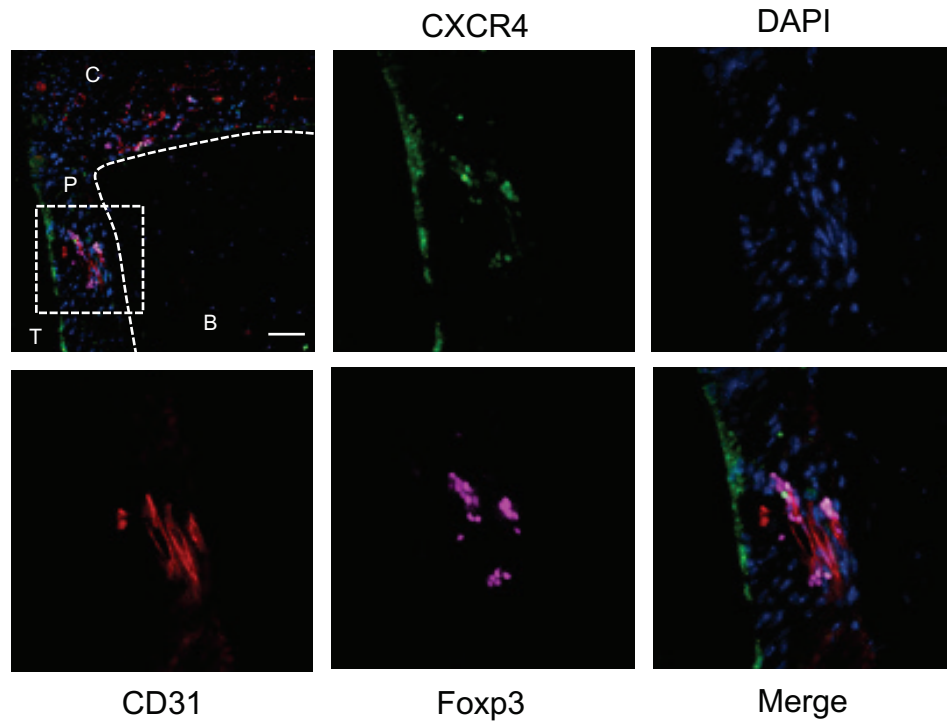

**Supplemental figure S2: Colocalization of FoXP3<sup>+</sup> Treg cells with CXCR4 and CD31 in the periodontal tissue of mice treated with 1,4-DPCA/hydrogel.** Mice were subjected to LIP for 10 days followed by 5 days without ligatures to enable resolution. At the onset of resolution (day 10), the mice were subcutaneously injected once with 1,4-DPCA/hydrogel or vehicle alone and were euthanized at day 15 for fluorescent histochemistry. Shown is a periodontal tissue section stained for CXCR4 (green), CD31 (red), FoXP3 (purple), and DAPI (blue). B, Bone; C, Connective tissue; P, Periodontal ligament; T, Tooth. Scale bar in the top left image is 100  $\mu$ m; the rest are enlarged images of the square inset.

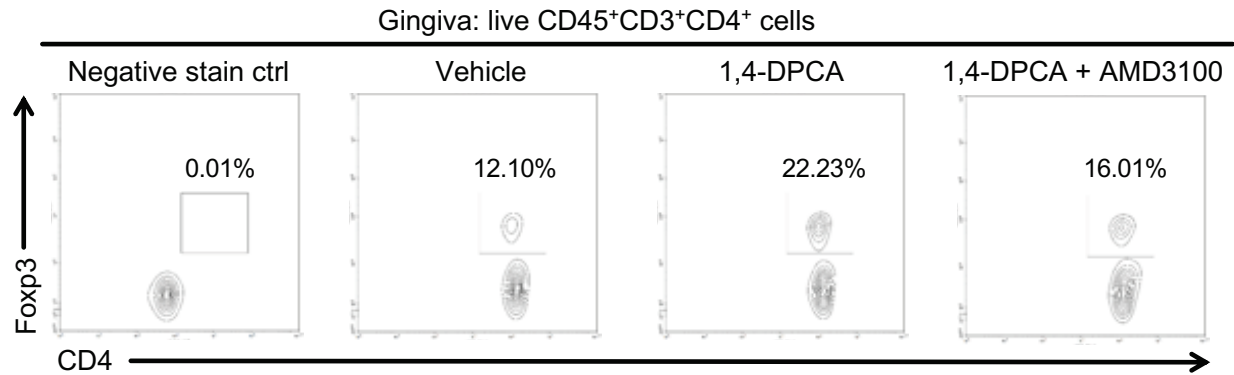

**Supplemental figure S3: AMD3100 inhibits Treg cell accumulation in gingival tissue induced by 1,4-DPCA/hydrogel during the resolution of periodontitis.** Groups of mice were subjected to LIP for 10 days followed by 5 days without ligatures to enable resolution. At the onset of resolution (day 10), groups of mice were subcutaneously injected once with vehicle alone (one group) or 1,4-DPCA/hydrogel (two groups). The 1,4-DPCA/hydrogel-treated groups were additionally intraperitoneally injected with AMD3100 or PBS control daily for 5 days. Gingival tissues were harvested on day 15 and processed for flow cytometric analysis to identify Foxp3<sup>+</sup> Treg cells. Shown are representative FACS plots of Treg cells in the gingival tissue on day 15.

**Supplemental Table S1: List of TaqMan gene expression primers (Thermo-Fisher Scientific).**

| <b>Assay ID</b> | <b>Gene symbol</b>            |
|-----------------|-------------------------------|
| Mm00446190_m1   | <i>Il6</i>                    |
| Mm00439618_m1   | <i>Il17a</i>                  |
| Mm00443258_m1   | <i>Tnf</i>                    |
| Mm00501584_m1   | <i>Runx2</i>                  |
| Mm00475834_m1   | <i>Alpl</i>                   |
| Mm03413826_mH   | <i>Bglap</i>                  |
| Mm00475162_m1   | <i>Foxp3</i>                  |
| Mm01178820_m1   | <i>Tgf<math>\beta</math>1</i> |
| Mm01288386_m1   | <i>Il10</i>                   |
| Mm00437306_m1   | <i>Vegfa</i>                  |
| Mm00445552_m1   | <i>Cxcl12</i>                 |
| Mm01996749_s1   | <i>Cxcr4</i>                  |
| Mm01545399_m1   | <i>Hprt</i>                   |
